# Supplementary material
Source: PubMed Central journal article supplement (PMC7643045)

## Supplemental Online Content

Yang L-T, Anand V, Zambito EI, et al. Association of echocardiographic left ventricular end-systolic volume and volume-derived ejection fraction with outcome in asymptomatic chronic aortic regurgitation. *JAMA Cardiol*. Published online November 4, 2020. doi:10.1001/jamacardio.2020.5268

**eFigure 1.** Study flow

**eFigure 2.** Correlations between LVESVi and LVESDi

**eFigure 3.** Correlations between LVESVi, LVESDi and age

**eFigure 4.** Incidence of surgery

**eTable.** Comparison between LV volumes measured prospectively and retrospectively

This supplemental material has been provided by the authors to give readers additional information about their work.

**eFigure 1. Study flow**

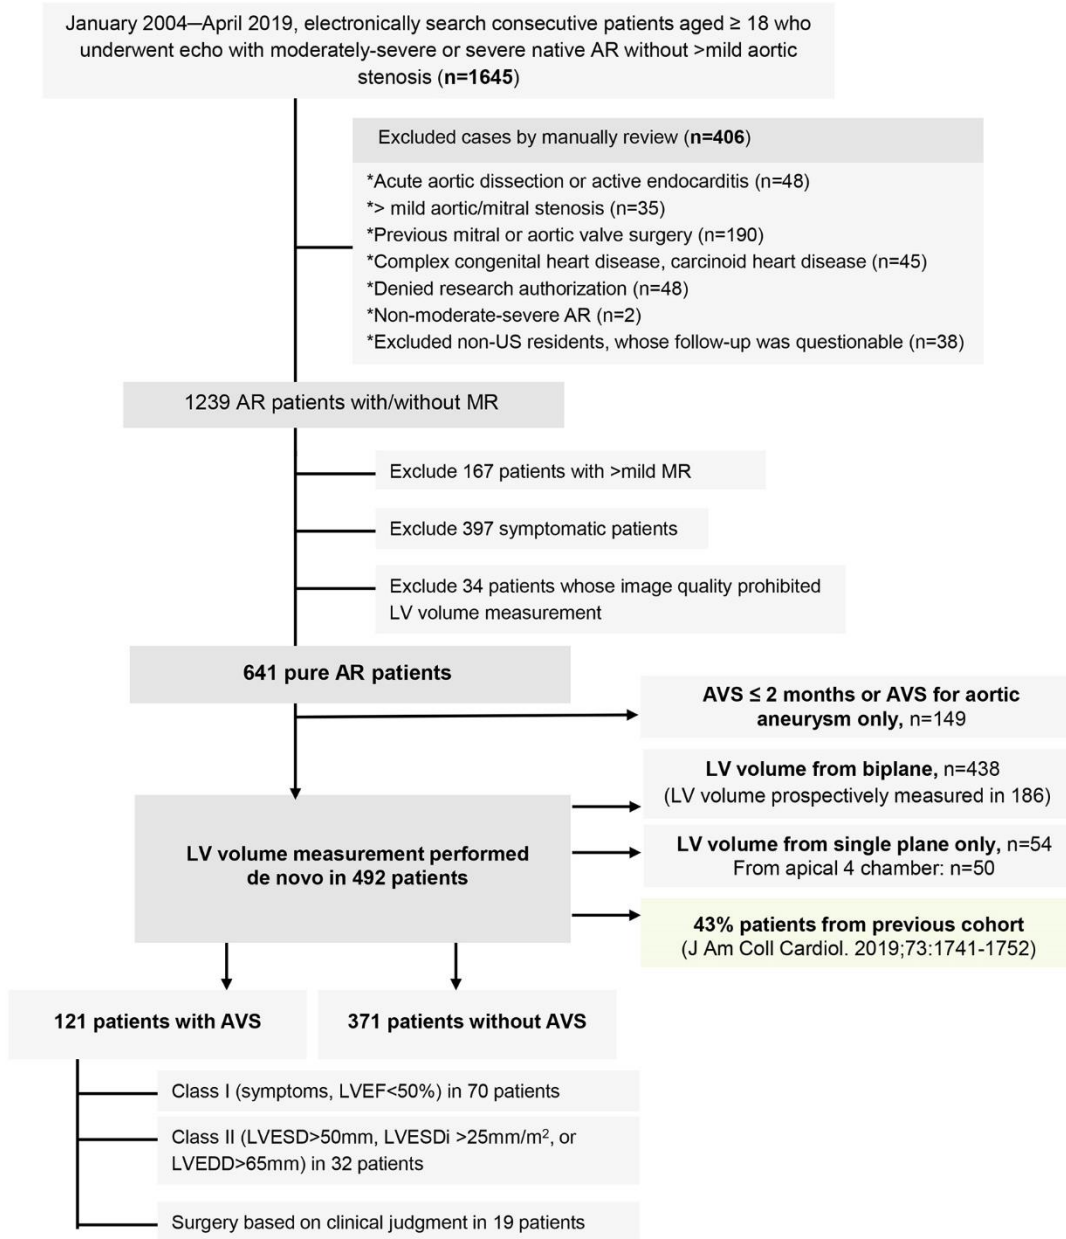

**eFigure 2. Correlations between LVESVi and LVESDi.** There was a linear relationship between LVESVi and LVESDi.

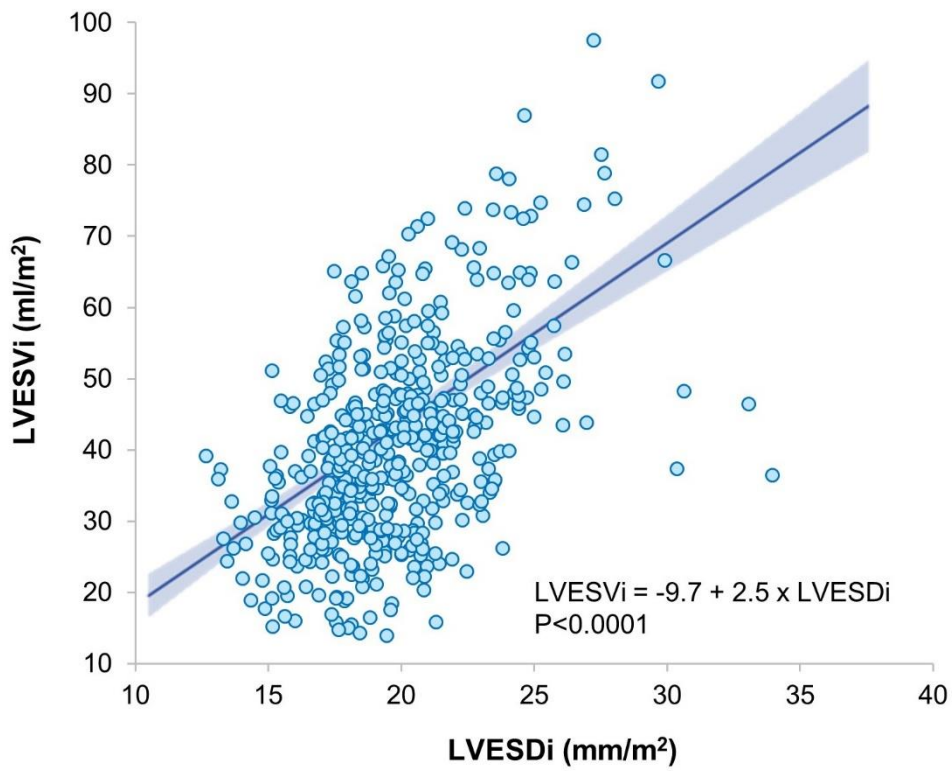

**eTable. Comparison between LV volumes measured prospectively and retrospectively**

|                  | Multiple sonographers | One observer<br>L.T.Y | Pearson correlation | P       |
|------------------|-----------------------|-----------------------|---------------------|---------|
| LVEDV            | 203±53                | 201±53                | 0.76                | <0.0001 |
| LVESV            | 88±33                 | 85±32                 | 0.80                | <0.0001 |
| LV stroke volume | 115±30                | 117±29                | 0.62                | <0.0001 |
| Vol-LVEF         | 57±8                  | 59±8                  | 0.68                | <0.0001 |

**eFigure 3. Correlations between LVESVi, LVESDi and age.** There was an inverse relationship between age and LVESVi (left). LVESDi was not affected by age.

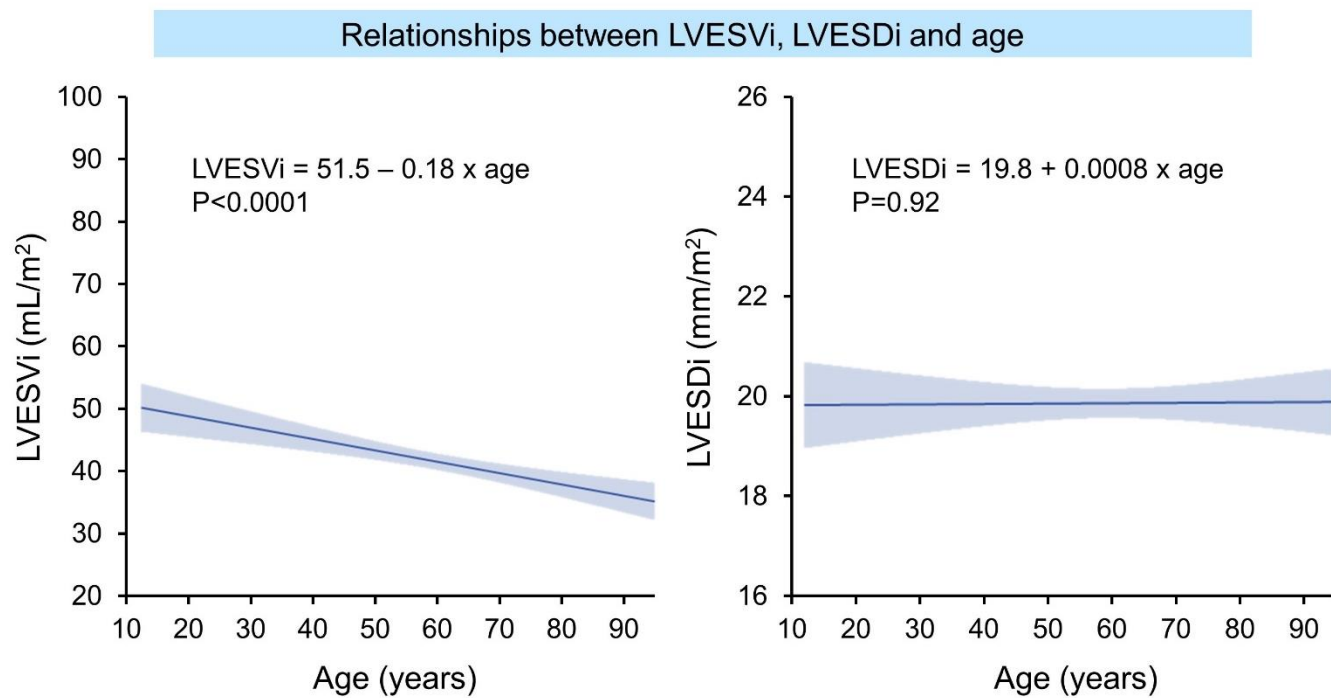

**eFigure 4. Incidence of surgery.** (A) Overall incidence of surgery and (B) incidence of surgery according to LVESVi > 45ml/m<sup>2</sup> or not. Five- and ten-year surgical incidence is shown. Note that the curves begin at 2 months because patients having surgery within 2 months of baseline echo were excluded from this analysis.

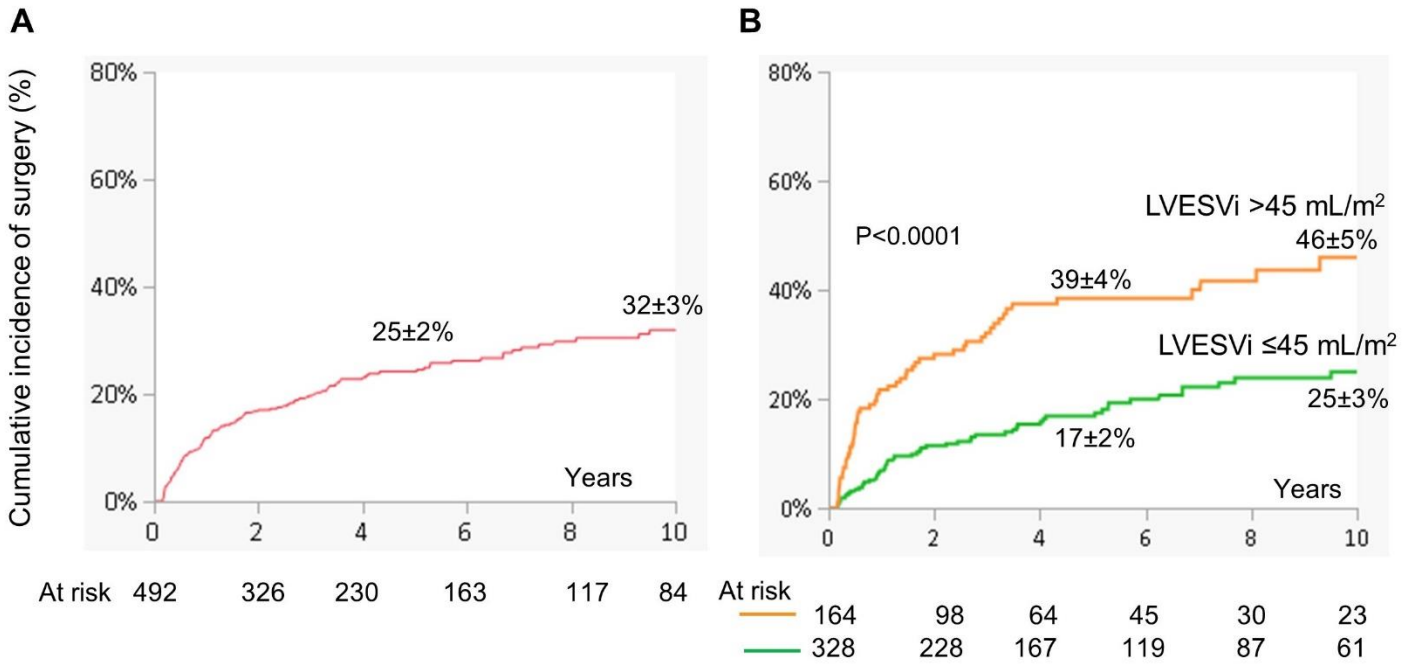

Supplement: jamacardiol-e205268-s001.pdf [file jamacardiol-e205268-s001.pdf]
